# Supplementary material for: Cell membrane fusion induced by surface modification with cell-penetrating peptide–lipid conjugates that facilitates close contact between distinct membranes
Source: Royal Society of Chemistry journal article supplement (doi:10.1039/d4ma00193a), 2024-01-01
Supplement: d4ma00193a1.pdf [file d4ma00193a1.pdf]

## Supporting information

### **Cell membrane fusion induced by surface modification with cell-penetrating peptide-lipid conjugates that facilitates close contact between distinct membranes**

Yuya Sato<sup>1,2</sup>, Teruhiko Baba<sup>2</sup>, Takeyuki Uchida<sup>3</sup>, Ung-il Chung<sup>1</sup>, and Yuji Teramura<sup>2,4,5\*</sup>

<sup>1</sup>Department of Bioengineering, Graduate School of Engineering, The University of Tokyo, 7-3-1 Hongo, Bunkyo-ku, Tokyo, 113-8656, Japan

<sup>2</sup>Cellular and Molecular Biotechnology Research Institute (CMB), National Institute of Advanced Industrial Science and Technology (AIST), AIST Tsukuba Central 5, 1-1-1 Higashi, Tsukuba, Ibaraki 305-8565, Japan

<sup>3</sup>Research Institute of Electrochemical Energy, Department of Energy and Environment, National Institute of Advanced Industrial Science and Technology (AIST), 1-8-31 Midorigaoka, Ikeda, Osaka 563-8577, Japan

<sup>4</sup>Department of Immunology, Genetics and Pathology (IGP), Uppsala University, Dag Hammarskjölds väg 20, SE-751 85, Uppsala, Sweden

<sup>5</sup>Master's/Doctoral Program in Life Science Innovation (T-LSI), University of Tsukuba, 1-1-1 Tennodai, Tsukuba, Ibaraki 305-8577 Japan

#### **\*Corresponding Author**

Yuji TERAMURA

Tel: +81(0)29-861-6582

E-mail: [y.teramura@aist.go.jp](mailto:y.teramura@aist.go.jp)

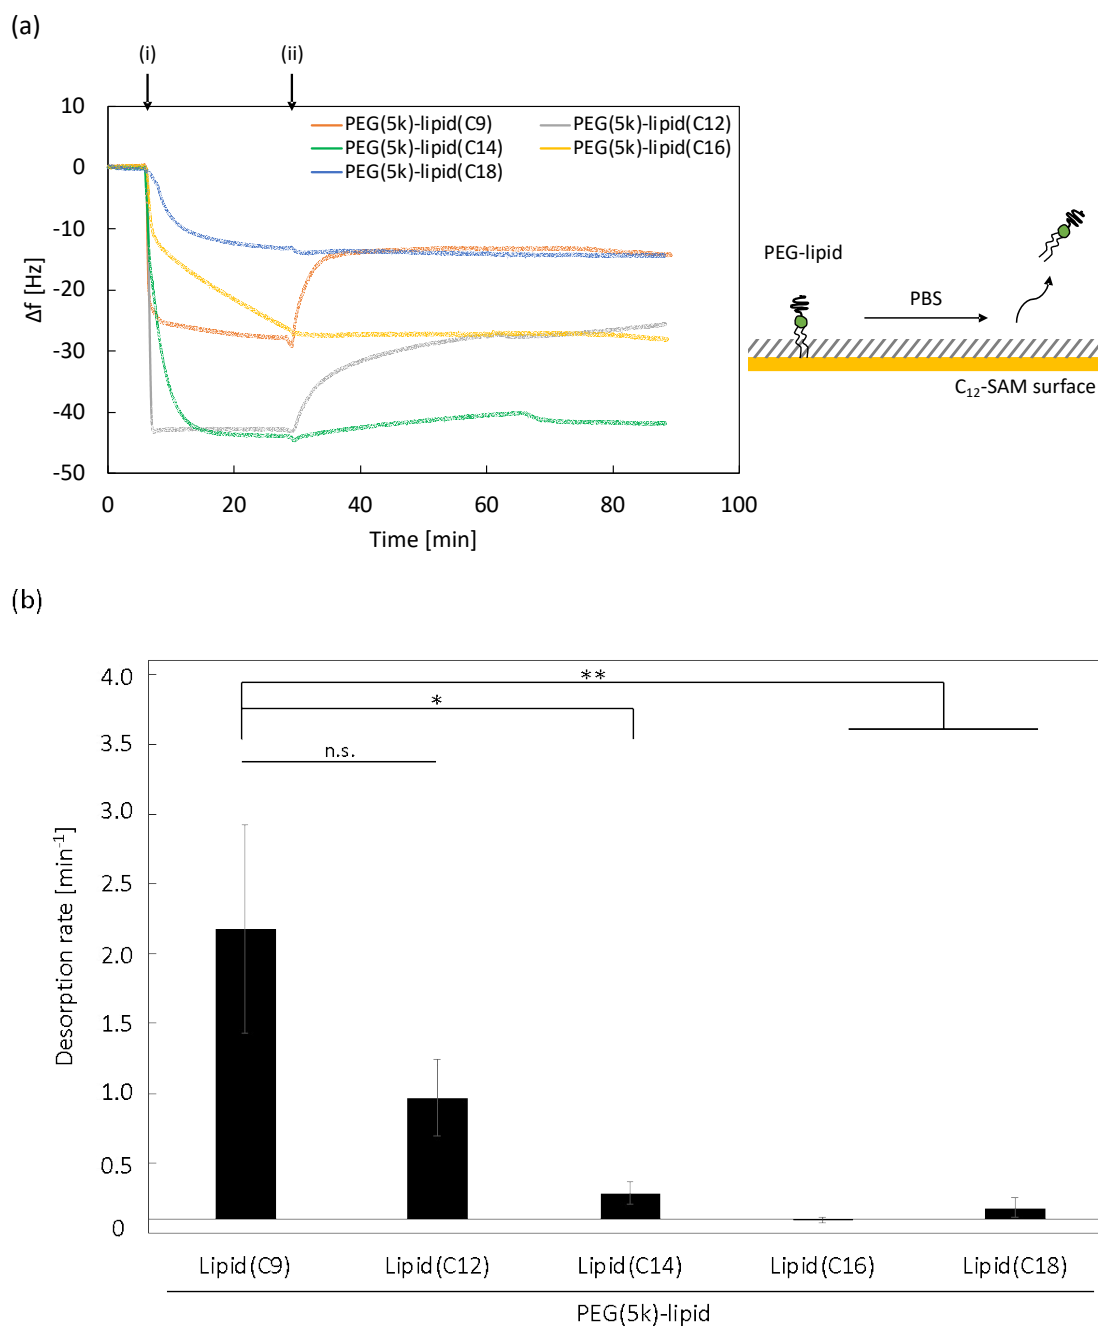

**Supplementary Figure S1.** Analysis of the interaction between PEG(5k)-lipids with different lipid lengths and hydrophobic  $\text{C}_{12}$ -SAM surface by a quartz crystal microbalance with dissipation monitoring (QCM-D). (a) Raw profiles of QCM-D for the interaction of PEG(5k)-lipids(C9, C12, C14, C16, C18) with the SAM surface. After the PEG-lipid ( $50 \mu\text{g/mL}$ ) flowed to the sensor surface (arrow i), it was rinsed with PBS (arrow ii). (b) Quantitative analysis of desorption rate of PEG(5k)-lipids. Error bars indicate standard deviation;  $n = 3$ .

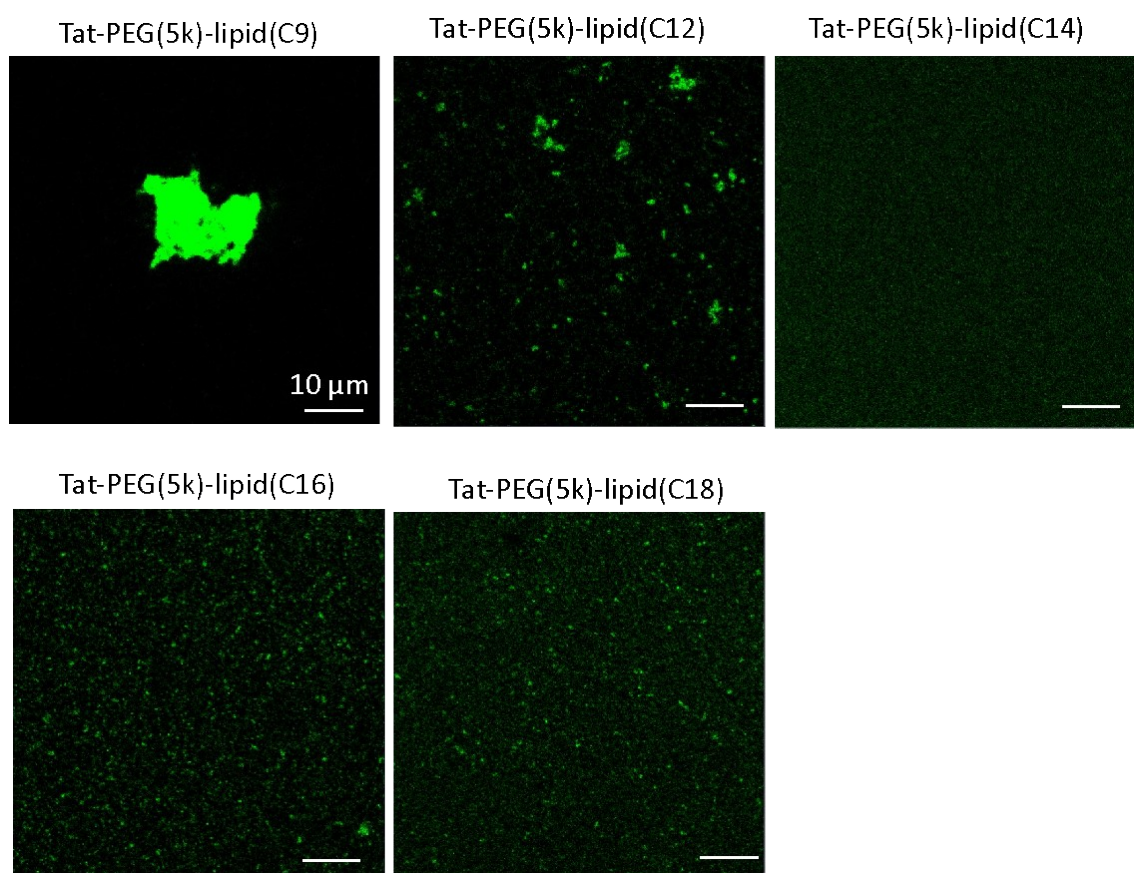

**Supplementary Figure S2.** Confocal images of liposome(CF) treated with Tat-PEG(5k)-lipids with different lipid lengths. Liposome(CF) was treated with Tat-PEG(5k)-lipids(C9, C12, C14, C16, C18) and then observed using a confocal laser scanning microscope.

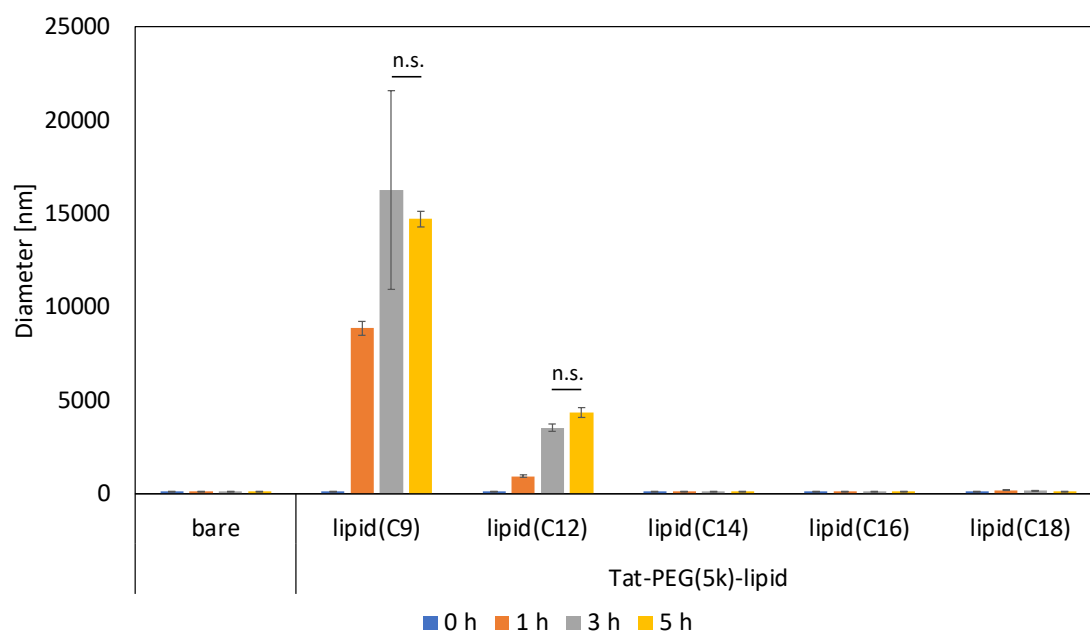

**Supplementary Figure S3.** Liposome size change treated with Tat-PEG(5k)-lipids with different lipid lengths at 0, 1, 3, and 5h. Liposome was treated with Tat-PEG(5k)-lipids(C9, C12, C14, C16, C18) for 0, 1, 3, and 5h, and then observed using dynamic light scattering analysis. Error bars indicate standard deviation; n = 3.

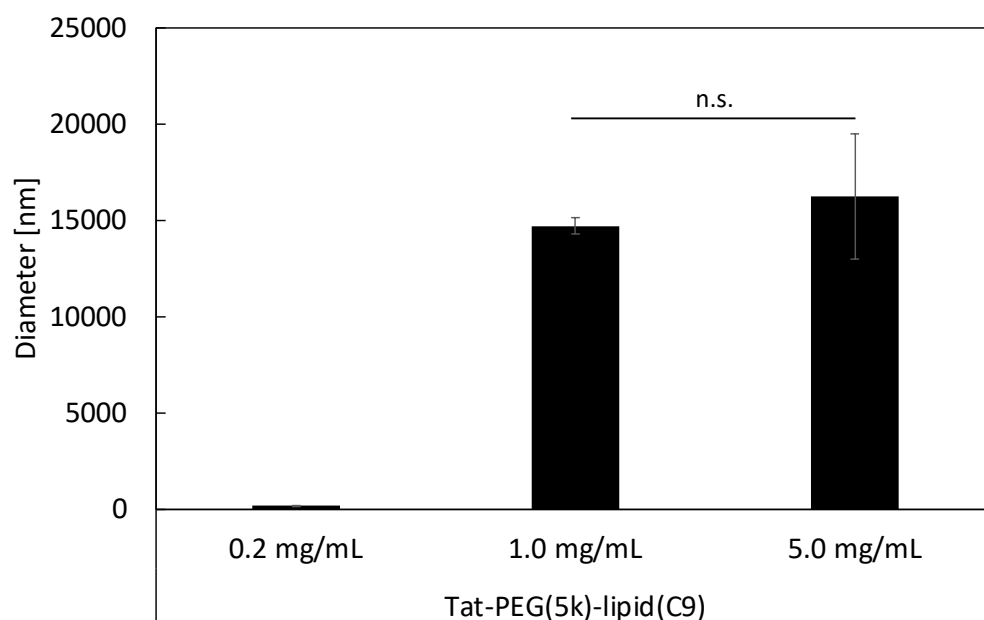

**Supplementary Figure S4.** Liposome size treated with each different concentration of Tat-PEG(5k)-lipid(C9) for 5h. Liposome was treated with Tat-PEG(5k)-lipids(C9) (0.2, 1.0, 5.0 mg/mL) for 5h and then observed using dynamic light scattering analysis. Error

bars indicate standard deviation; n = 3.

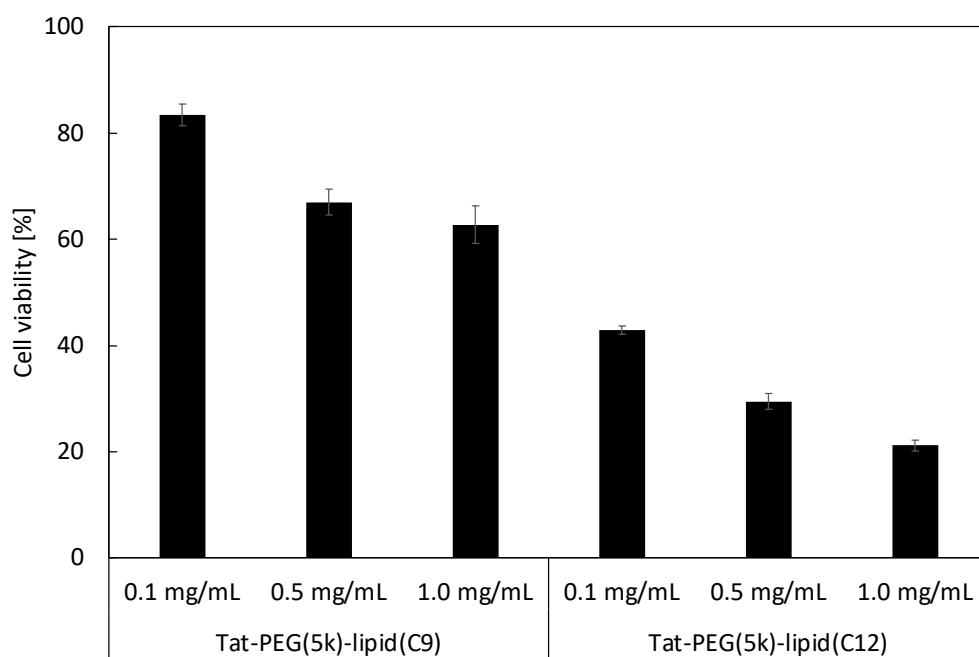

**Supplementary Figure S5.** Cell viability after treatment. Cells were treated with each concentration of Tat-PEG(5k)-lipid(C9, 12) for 6h. Cell suspension of CCRF-CEM and ADSCs was treated with Tat-PEG(5k)-lipids(C9) (0.1, 0.5, 1.0 mg/mL) for 6h and then analyzed the cell viability using Cell Counting Kit-8. Error bars indicate standard deviation; n = 3.

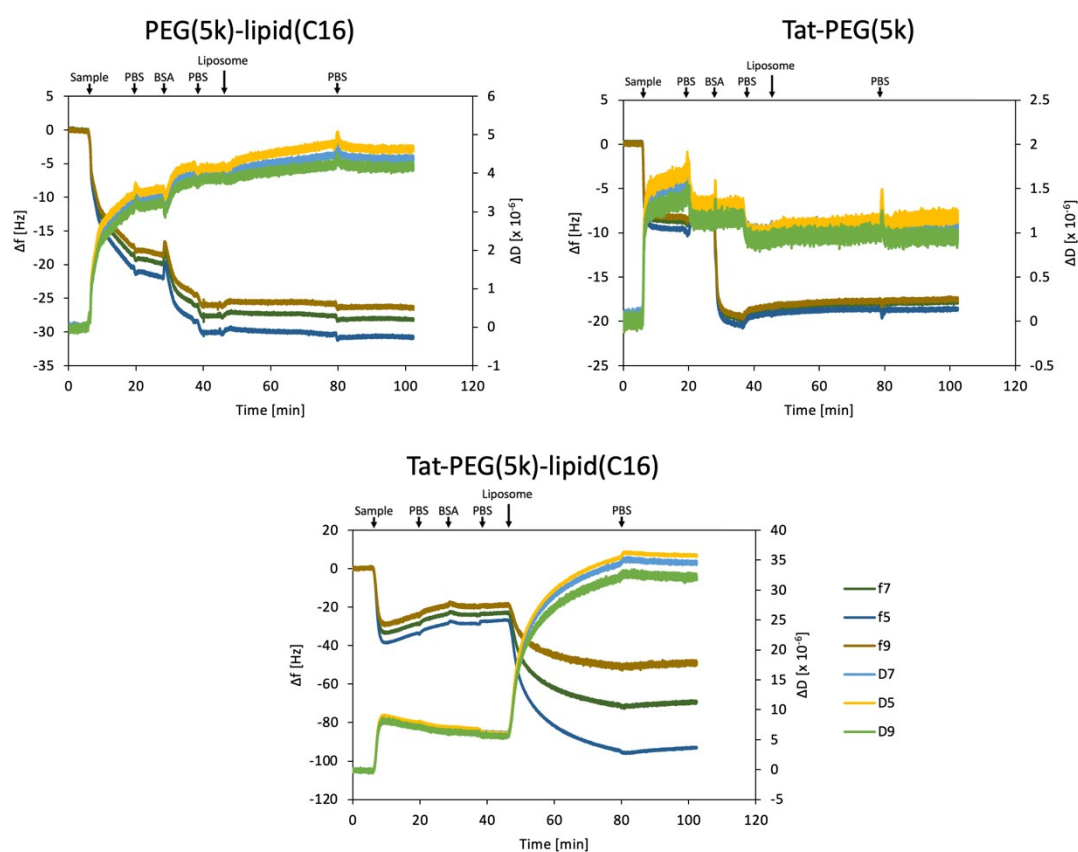

**Supplementary Figure S6.** QCM-D analysis of the interaction between Tat-PEG(5k)-lipid(C16) and the liposome on a hydrophobic C<sub>12</sub>-SAM surface. For all experiments n = 3.

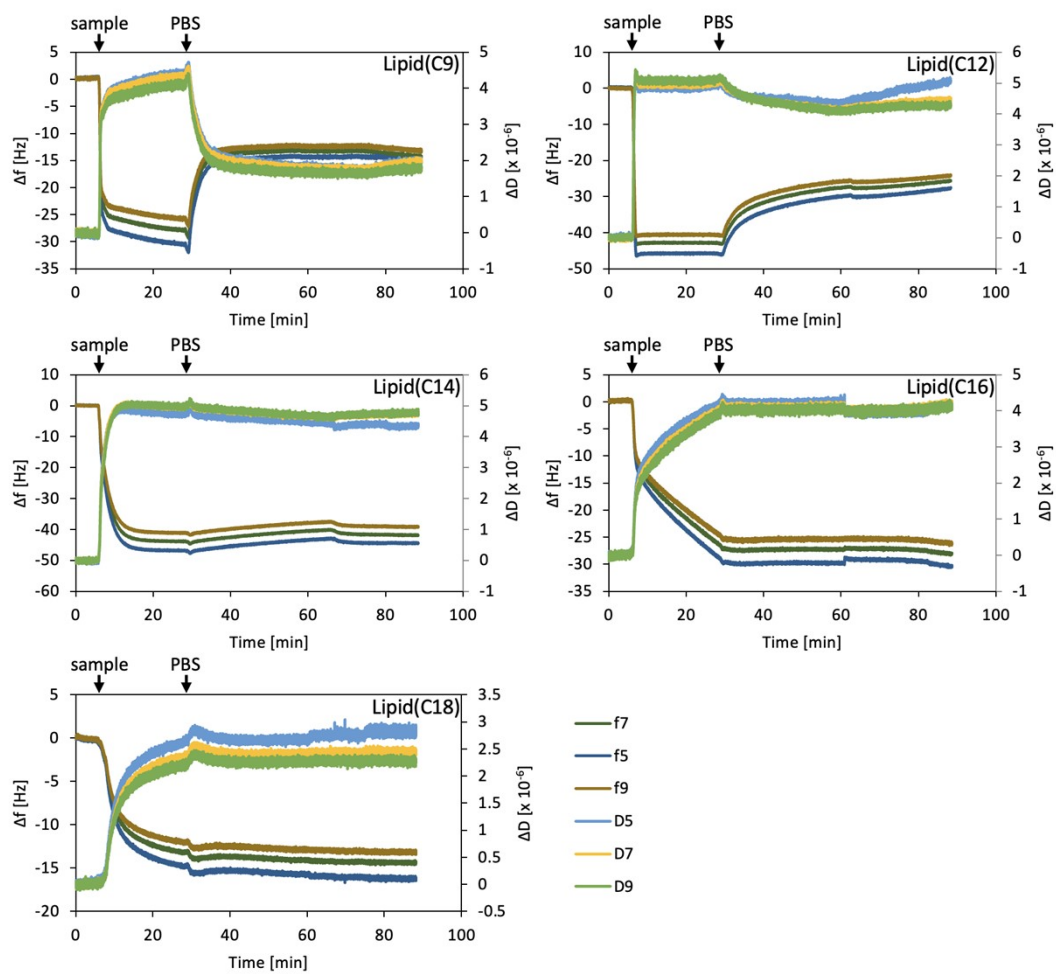

**Supplementary Figure S7.** QCM-D analysis of the interaction between PEG(5k)-lipids with different lipid lengths and hydrophobic C<sub>12</sub>-SAM surface. For all experiments n = 3.

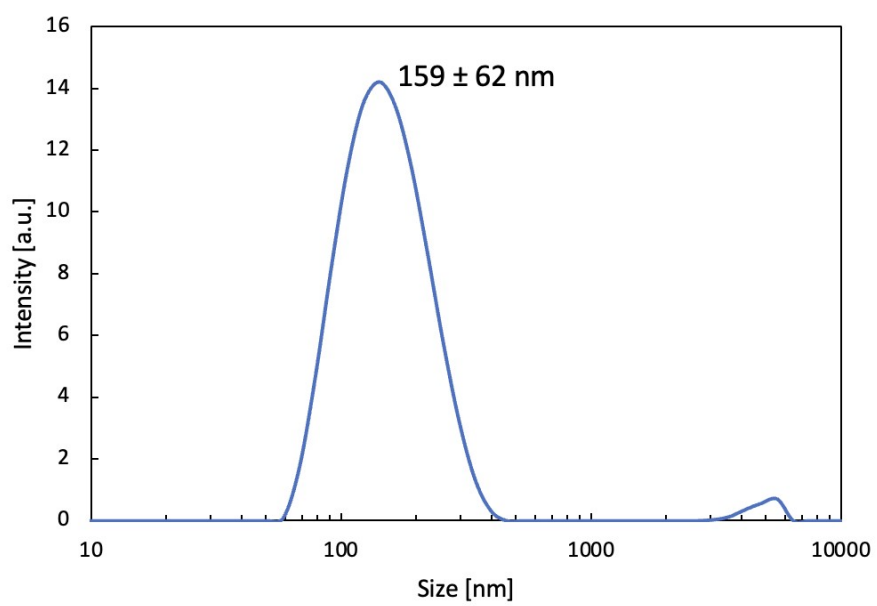

**Supplementary Figure S8.** Analysis of liposome size distribution and particle number by dynamic light scattering (DLS).

(a)

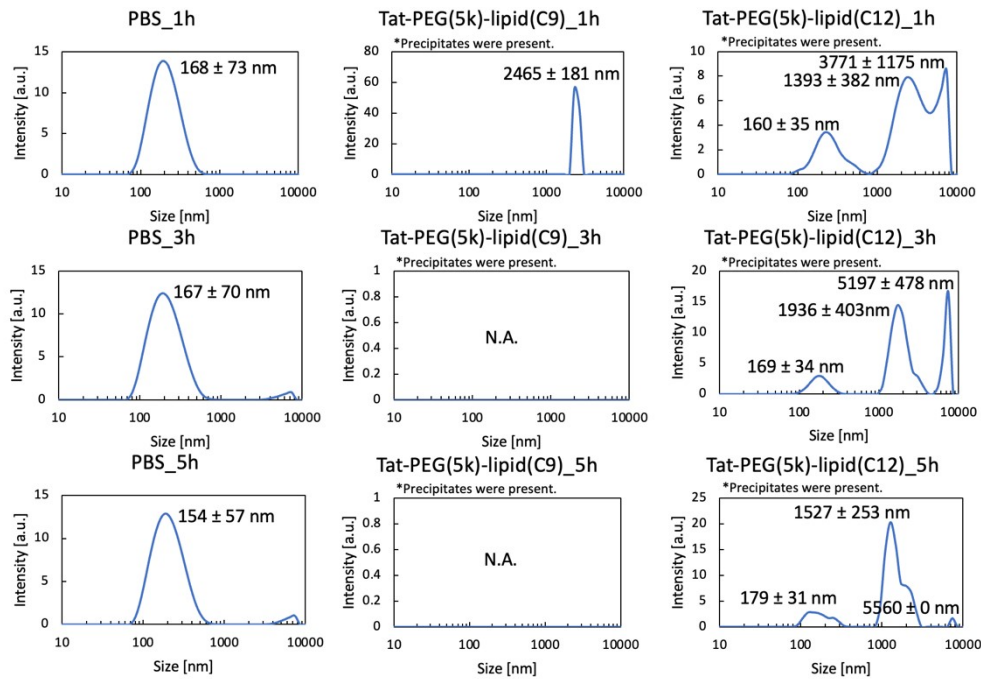

(b)

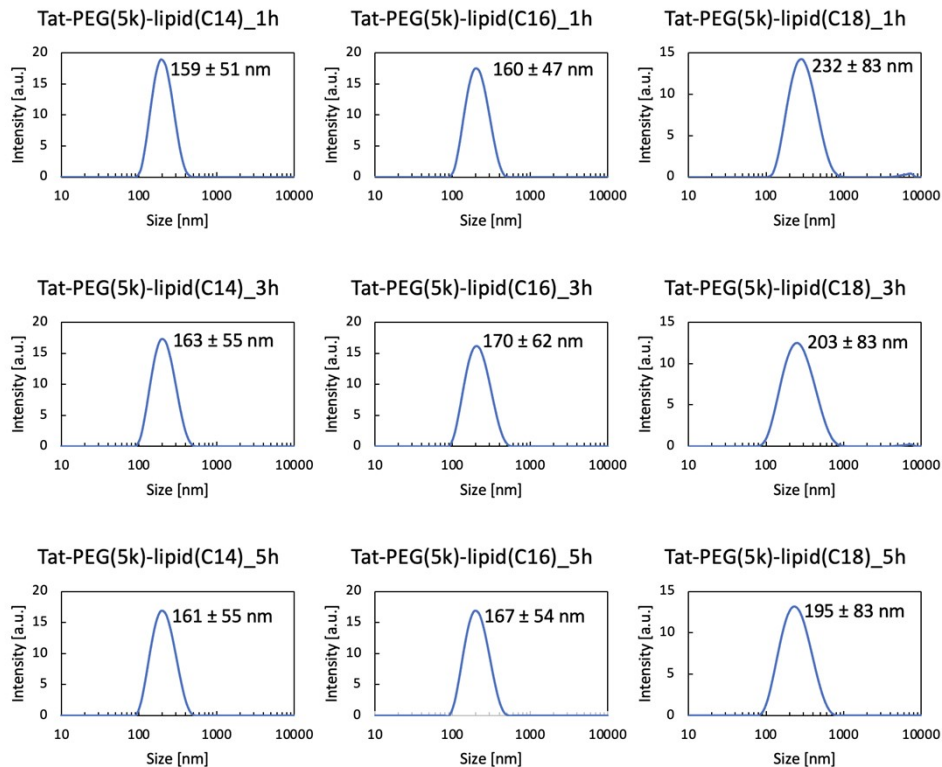

**Supplementary Figure S9.** Dynamic light scattering (DLS) analysis of size distribution of treated liposomes with PBS and Tat-PEG(5k)-lipids(C9, 12, 14, 16, 18) at 1, 3, 5 h. Visible precipitate was present in liposome suspension after treatment with Tat-PEG(5k)-lipids(C9,12).
